# Supplementary material
Source: publisher figshare collection journal article supplement (https://gsajournals.figshare.com/ndownloader/files/12429701)
Supplement: Supplementary file 1 [file 12429701]

## Sheet: Sheet1
Accession numbers of 196 dog/wolf genome sequences. The genome sequences were derived from the dogs shown in Figure_3 (bolded) plus 192 controls.
Sample ID	Breed	Study Accession	Sample Accession	Remarks
AC023	Australian Cattle dog	PRJEB16012	SAMEA104091560
AC065	Australian Cattle dog	PRJEB13468	SAMEA3928139
AC108	Australian Cattle dog	PRJEB16012	SAMEA4504820
AD009	Alpine Dachsbracke	PRJEB14840	SAMEA4346711
AM007	Alaskan Malamute	PRJEB16012	SAMEA104091571
AR001	Australian Terrier	PRJEB16012	SAMEA4504840
AS006	American Staffordshire Terrier	PRJEB16012	SAMEA4504831
BB011	Berger Blanc Suisse	PRJEB16012	SAMEA4506887
BC0480	Border Collie	PRJEB16012	SAMEA104091558
BC272	Border Collie	PRJEB4544	SAMEA2177732
BC273	Border Collie	PRJEB16012	SAMEA4505490
BC485	Border Collie	PRJEB16012	SAMEA104125112
BC518	Border Collie	PRJEB16012	SAMEA104125113
BC555	Border Collie	PRJEB16012	SAMEA104125114
BC597	Border Collie	PRJEB16012	SAMEA104125115
BD016	Bearded Collie	PRJEB13468	SAMEA3928140
BD036	Bearded Collie	PRJEB16012	SAMEA4505492
BD052	Bearded Collie	PRJEB16012	SAMEA4504824
BD085	Bearded Collie	PRJEB16012	SAMEA4505493
BD089	Bearded Collie	PRJEB16012	SAMEA4504827
BD091	Bearded Collie	PRJEB16012	SAMEA4505496
BD093	Bearded Collie	PRJEB16012	SAMEA4504832
BD098	Bearded Collie	PRJEB16012	SAMEA4504839
BE020	Beagle	PRJEB5500	SAMEA2376414
BG064	Bavarian Hound	PRJEB16012	SAMEA104091562
BH003	Basset	PRJEB16012	SAMEA4509488
BT007	Miniature Bull Terrier	PRJEB16012	SAMEA4506897
BT012	Bull Terrier	PRJEB16012	SAMEA104125116
BU002	Bull Mastiff	PRJEB16012	SAMEA103949042
CE073	Cairn Terrier	PRJEB16012	SAMEA104091555
CH019	Chihuahua	PRJEB13139	SAMEA3905753
CK006	Cavalier King Charles Spaniel	PRJEB16012	SAMEA104091570
CK023	Cavalier King Charles Spaniel	PRJEB16012	SAMEA104091569
CP003	Cocker Spaniel	PRJEB16012	SAMEA4506900
CR039	Curly Coated Retriever	PRJEB16012	SAMEA104091556
CW011	Chow Chow	PRJEB16012	SAMEA104091566
DD116	Great Dane	PRJEB16012	SAMEA104091557
DH0117	Dachshund	PRJEB16012	SAMEA104091567
DH098	Dachshund	PRJEB7736	SAMEA3121338
DH126	Dachshund	PRJEB16012	SAMEA104125117
DO159	Doberman Pinscher	PRJEB16012	SAMEA4509491
DO242	Doberman Pinscher	PRJEB16012	SAMEA4505489
DO263	Doberman Pinscher	PRJEB16012	SAMEA4509492
DQ1	Chinese indigenous dogs	PRJNA266585	Bai, B., W.-M. Zhao, B.-X. Tang, Y.-Q. Wang, L. Wang et al., 2015 DoGSD: The Dog and Wolf Genome SNP Database. Nucleic Acids Res. 43 (Database issue): D777-783.
DQ10	Chinese indigenous dogs	PRJNA266585	Bai, B., W.-M. Zhao, B.-X. Tang, Y.-Q. Wang, L. Wang et al., 2015 DoGSD: The Dog and Wolf Genome SNP Database. Nucleic Acids Res. 43 (Database issue): D777-783.
DQ2	Chinese indigenous dogs	PRJNA266585	Bai, B., W.-M. Zhao, B.-X. Tang, Y.-Q. Wang, L. Wang et al., 2015 DoGSD: The Dog and Wolf Genome SNP Database. Nucleic Acids Res. 43 (Database issue): D777-783.
DQ3	Chinese indigenous dogs	PRJNA266585	Bai, B., W.-M. Zhao, B.-X. Tang, Y.-Q. Wang, L. Wang et al., 2015 DoGSD: The Dog and Wolf Genome SNP Database. Nucleic Acids Res. 43 (Database issue): D777-783.
DQ4	Chinese indigenous dogs	PRJNA266585	Bai, B., W.-M. Zhao, B.-X. Tang, Y.-Q. Wang, L. Wang et al., 2015 DoGSD: The Dog and Wolf Genome SNP Database. Nucleic Acids Res. 43 (Database issue): D777-783.
DQ5	Chinese indigenous dogs	PRJNA266585	Bai, B., W.-M. Zhao, B.-X. Tang, Y.-Q. Wang, L. Wang et al., 2015 DoGSD: The Dog and Wolf Genome SNP Database. Nucleic Acids Res. 43 (Database issue): D777-783.
DQ6	Chinese indigenous dogs	PRJNA266585	Bai, B., W.-M. Zhao, B.-X. Tang, Y.-Q. Wang, L. Wang et al., 2015 DoGSD: The Dog and Wolf Genome SNP Database. Nucleic Acids Res. 43 (Database issue): D777-783.
DQ7	Chinese indigenous dogs	PRJNA266585	Bai, B., W.-M. Zhao, B.-X. Tang, Y.-Q. Wang, L. Wang et al., 2015 DoGSD: The Dog and Wolf Genome SNP Database. Nucleic Acids Res. 43 (Database issue): D777-783.
DQ8	Chinese indigenous dogs	PRJNA266585	Bai, B., W.-M. Zhao, B.-X. Tang, Y.-Q. Wang, L. Wang et al., 2015 DoGSD: The Dog and Wolf Genome SNP Database. Nucleic Acids Res. 43 (Database issue): D777-783.
DQ9	Chinese indigenous dogs	PRJNA266585	Bai, B., W.-M. Zhao, B.-X. Tang, Y.-Q. Wang, L. Wang et al., 2015 DoGSD: The Dog and Wolf Genome SNP Database. Nucleic Acids Res. 43 (Database issue): D777-783.
DS032	German Shepherd / Mixed breed	PRJEB14110	SAMEA3994036
DS041	German Shepherd / Mixed breed	PRJEB14110	SAMEA3994037
DS042	German Shepherd / Mixed breed	PRJEB14110	SAMEA3994038
DS043	German Shepherd	PRJEB16012	SAMEA4506895
DS051	German Shepherd	PRJEB16012	SAMEA72802168
DS053	German Shepherd	PRJEB16012	SAMEA72802918
EL565	Elo	PRJEB16012	SAMEA4506890
EN091	Entlebucher Sennenhund	PRJEB16012	SAMEA4504828
EN154	Entlebucher Sennenhund	PRJEB16012	SAMEA4505497
EN221	Entlebucher Sennenhund	PRJEB16012	SAMEA4504829
EN247	Entlebucher Sennenhund	PRJEB16012	SAMEA4505498
EN261	Entlebucher Sennenhund	PRJEB16012	SAMEA4504830
EN262	Entlebucher Sennenhund	PRJEB16012	SAMEA4505499
EN263	Entlebucher Sennenhund	PRJEB16012	SAMEA4505500
EN264	Entlebucher Sennenhund	PRJEB16012	SAMEA4505501
EU008	Eurasier	PRJEB6079	SAMEA2446720
EU035	Eurasier	PRJEB16012	SAMEA4506889
FB046	French Bulldog	PRJEB13468	SAMEA3928146
FB065	French Bulldog	PRJEB16012	SAMEA4504835
GR0855	Golden Retriever	PRJEB16012	SAMEA4504838
GR0859	Golden Retriever	PRJEB16012	SAMEA4506899
GR0860	Golden Retriever	PRJEB16012	SAMEA4509487
GR0892	Golden Retriever	PRJEB16012	SAMEA104016307
GR1078	Golden Retriever	PRJEB16012	SAMEA104091572
GS1	German Shepherd	PRJNA266585	Bai, B., W.-M. Zhao, B.-X. Tang, Y.-Q. Wang, L. Wang et al., 2015 DoGSD: The Dog and Wolf Genome SNP Database. Nucleic Acids Res. 43 (Database issue): D777-783.
GS10	German Shepherd	PRJNA266585	Bai, B., W.-M. Zhao, B.-X. Tang, Y.-Q. Wang, L. Wang et al., 2015 DoGSD: The Dog and Wolf Genome SNP Database. Nucleic Acids Res. 43 (Database issue): D777-783.
GS104	German Spitz	PRJEB16012	SAMEA104105252
GS2	German Shepherd	PRJNA266585	Bai, B., W.-M. Zhao, B.-X. Tang, Y.-Q. Wang, L. Wang et al., 2015 DoGSD: The Dog and Wolf Genome SNP Database. Nucleic Acids Res. 43 (Database issue): D777-783.
GS3	German Shepherd	PRJNA266585	Bai, B., W.-M. Zhao, B.-X. Tang, Y.-Q. Wang, L. Wang et al., 2015 DoGSD: The Dog and Wolf Genome SNP Database. Nucleic Acids Res. 43 (Database issue): D777-783.
GS4	German Shepherd	PRJNA266585	Bai, B., W.-M. Zhao, B.-X. Tang, Y.-Q. Wang, L. Wang et al., 2015 DoGSD: The Dog and Wolf Genome SNP Database. Nucleic Acids Res. 43 (Database issue): D777-783.
GS5	German Shepherd	PRJNA266585	Bai, B., W.-M. Zhao, B.-X. Tang, Y.-Q. Wang, L. Wang et al., 2015 DoGSD: The Dog and Wolf Genome SNP Database. Nucleic Acids Res. 43 (Database issue): D777-783.
GS6	German Shepherd	PRJNA266585	Bai, B., W.-M. Zhao, B.-X. Tang, Y.-Q. Wang, L. Wang et al., 2015 DoGSD: The Dog and Wolf Genome SNP Database. Nucleic Acids Res. 43 (Database issue): D777-783.
GS7	German Shepherd	PRJNA266585	Bai, B., W.-M. Zhao, B.-X. Tang, Y.-Q. Wang, L. Wang et al., 2015 DoGSD: The Dog and Wolf Genome SNP Database. Nucleic Acids Res. 43 (Database issue): D777-783.
GS8	German Shepherd	PRJNA266585	Bai, B., W.-M. Zhao, B.-X. Tang, Y.-Q. Wang, L. Wang et al., 2015 DoGSD: The Dog and Wolf Genome SNP Database. Nucleic Acids Res. 43 (Database issue): D777-783.
GS9	German Shepherd	PRJNA266585	Bai, B., W.-M. Zhao, B.-X. Tang, Y.-Q. Wang, L. Wang et al., 2015 DoGSD: The Dog and Wolf Genome SNP Database. Nucleic Acids Res. 43 (Database issue): D777-783.
GW004	German Wirehaired	PRJEB13468	SAMEA3928144
GY432	Greyhound	PRJEB16012	SAMEA104125118
HT001	Heideterrier	PRJEB16012	SAMEA103135918
HW1706	Hovawart	PRJEB16012	SAMEA4506894
IT221	Irish Terrier	PRJEB13468	SAMEA3928141
JR0034	Jack Russell Terrier	PRJEB16012	SAMEA104125119
JT007	German Hunting Terrier	PRJEB16012	SAMEA104125120
KF042	Kromfohrländer	PRJEB6076	SAMEA2446055
KKH2684	Siberian Husky	PRJEB10823	SAMEA3539249
KM1	Kunming Dog	PRJNA266585	Bai, B., W.-M. Zhao, B.-X. Tang, Y.-Q. Wang, L. Wang et al., 2015 DoGSD: The Dog and Wolf Genome SNP Database. Nucleic Acids Res. 43 (Database issue): D777-783.
KM10	Kunming Dog	PRJNA266585	Bai, B., W.-M. Zhao, B.-X. Tang, Y.-Q. Wang, L. Wang et al., 2015 DoGSD: The Dog and Wolf Genome SNP Database. Nucleic Acids Res. 43 (Database issue): D777-783.
KM2	Kunming Dog	PRJNA266585	Bai, B., W.-M. Zhao, B.-X. Tang, Y.-Q. Wang, L. Wang et al., 2015 DoGSD: The Dog and Wolf Genome SNP Database. Nucleic Acids Res. 43 (Database issue): D777-783.
KM3	Kunming Dog	PRJNA266585	Bai, B., W.-M. Zhao, B.-X. Tang, Y.-Q. Wang, L. Wang et al., 2015 DoGSD: The Dog and Wolf Genome SNP Database. Nucleic Acids Res. 43 (Database issue): D777-783.
KM4	Kunming Dog	PRJNA266585	Bai, B., W.-M. Zhao, B.-X. Tang, Y.-Q. Wang, L. Wang et al., 2015 DoGSD: The Dog and Wolf Genome SNP Database. Nucleic Acids Res. 43 (Database issue): D777-783.
KM5	Kunming Dog	PRJNA266585	Bai, B., W.-M. Zhao, B.-X. Tang, Y.-Q. Wang, L. Wang et al., 2015 DoGSD: The Dog and Wolf Genome SNP Database. Nucleic Acids Res. 43 (Database issue): D777-783.
KM6	Kunming Dog	PRJNA266585	Bai, B., W.-M. Zhao, B.-X. Tang, Y.-Q. Wang, L. Wang et al., 2015 DoGSD: The Dog and Wolf Genome SNP Database. Nucleic Acids Res. 43 (Database issue): D777-783.
KM7	Kunming Dog	PRJNA266585	Bai, B., W.-M. Zhao, B.-X. Tang, Y.-Q. Wang, L. Wang et al., 2015 DoGSD: The Dog and Wolf Genome SNP Database. Nucleic Acids Res. 43 (Database issue): D777-783.
KM8	Kunming Dog	PRJNA266585	Bai, B., W.-M. Zhao, B.-X. Tang, Y.-Q. Wang, L. Wang et al., 2015 DoGSD: The Dog and Wolf Genome SNP Database. Nucleic Acids Res. 43 (Database issue): D777-783.
KM9	Kunming Dog	PRJNA266585	Bai, B., W.-M. Zhao, B.-X. Tang, Y.-Q. Wang, L. Wang et al., 2015 DoGSD: The Dog and Wolf Genome SNP Database. Nucleic Acids Res. 43 (Database issue): D777-783.
LA1869	Labrador Retriever	PRJEB16012	SAMEA4504834
LA2382	Labrador Retriever	PRJEB16012	SAMEA104125075
LA2443	Labrador Retriever	PRJEB16012	SAMEA104091568
LA882	Labrador Retriever	PRJEB5874	SAMEA2417015
LA900	Labrador Retriever	PRJEB5875	SAMEA2417016
LB111	Leonberger	PRJEB16012	SAMEA47266168
LB1919	Leonberger	PRJEB16012	SAMEA103935360
LJ1	Chinese indigenous dogs	PRJNA266585	Bai, B., W.-M. Zhao, B.-X. Tang, Y.-Q. Wang, L. Wang et al., 2015 DoGSD: The Dog and Wolf Genome SNP Database. Nucleic Acids Res. 43 (Database issue): D777-783.
LJ10	Chinese indigenous dogs	PRJNA266585	Bai, B., W.-M. Zhao, B.-X. Tang, Y.-Q. Wang, L. Wang et al., 2015 DoGSD: The Dog and Wolf Genome SNP Database. Nucleic Acids Res. 43 (Database issue): D777-783.
LJ2	Chinese indigenous dogs	PRJNA266585	Bai, B., W.-M. Zhao, B.-X. Tang, Y.-Q. Wang, L. Wang et al., 2015 DoGSD: The Dog and Wolf Genome SNP Database. Nucleic Acids Res. 43 (Database issue): D777-783.
LJ3	Chinese indigenous dogs	PRJNA266585	Bai, B., W.-M. Zhao, B.-X. Tang, Y.-Q. Wang, L. Wang et al., 2015 DoGSD: The Dog and Wolf Genome SNP Database. Nucleic Acids Res. 43 (Database issue): D777-783.
LJ4	Chinese indigenous dogs	PRJNA266585	Bai, B., W.-M. Zhao, B.-X. Tang, Y.-Q. Wang, L. Wang et al., 2015 DoGSD: The Dog and Wolf Genome SNP Database. Nucleic Acids Res. 43 (Database issue): D777-783.
LJ5	Chinese indigenous dogs	PRJNA266585	Bai, B., W.-M. Zhao, B.-X. Tang, Y.-Q. Wang, L. Wang et al., 2015 DoGSD: The Dog and Wolf Genome SNP Database. Nucleic Acids Res. 43 (Database issue): D777-783.
LJ6	Chinese indigenous dogs	PRJNA266585	Bai, B., W.-M. Zhao, B.-X. Tang, Y.-Q. Wang, L. Wang et al., 2015 DoGSD: The Dog and Wolf Genome SNP Database. Nucleic Acids Res. 43 (Database issue): D777-783.
LJ7	Chinese indigenous dogs	PRJNA266585	Bai, B., W.-M. Zhao, B.-X. Tang, Y.-Q. Wang, L. Wang et al., 2015 DoGSD: The Dog and Wolf Genome SNP Database. Nucleic Acids Res. 43 (Database issue): D777-783.
LJ8	Chinese indigenous dogs	PRJNA266585	Bai, B., W.-M. Zhao, B.-X. Tang, Y.-Q. Wang, L. Wang et al., 2015 DoGSD: The Dog and Wolf Genome SNP Database. Nucleic Acids Res. 43 (Database issue): D777-783.
LJ9	Chinese indigenous dogs	PRJNA266585	Bai, B., W.-M. Zhao, B.-X. Tang, Y.-Q. Wang, L. Wang et al., 2015 DoGSD: The Dog and Wolf Genome SNP Database. Nucleic Acids Res. 43 (Database issue): D777-783.
LN048	Landseer	PRJEB9437	SAMEA3402917
LN47	Border Collie	PRJEB16012	SAMEA4504821
LR1030	Lagotto Romagnolo	PRJEB16012	SAMEA4509490
LR390	Lagotto Romagnolo	PRJEB13468	SAMEA3928142
LR433	Lagotto Romagnolo	PRJEB16012	SAMEA4505491
LR494	Lagotto Romagnolo	PRJEB16012	SAMEA4505494
LR753	Lagotto Romagnolo	PRJEB16012	SAMEA4504833
MA008	Malinois	PRJEB16012	SAMEA4504823
MA0163	Malinois	PRJEB16012	SAMEA104032048
MA094	Malinois	PRJEB16012	SAMEA4504826
MA142	Malinois	PRJEB16012	SAMEA104125121
MA152	Malinois	PRJEB16012	SAMEA4506898
MA324	Malinois	PRJEB16012	SAMEA104125122
MI016	Mixed Breed	PRJEB16012	SAMEA4506893
NW062	Norwich Terrier	PRJEB16012	SAMEA104091550
NW152	Norwich Terrier	PRJEB16012	SAMEA104091551
NW206	Norwich Terrier	PRJEB16012	SAMEA104091552
NW255	Norwich Terrier	PRJEB16012	SAMEA104091553
OS001	Old English Sheepdog	PRJEB16012	SAMEA4504841
PE002	Perro de Agua Español	PRJEB7903	SAMEA3164479
PL116	Poodle	PRJEB16012	SAMEA4506891
RO2	Rottweiler	PRJEB7735	SAMEA3121337
RR098	Rhodesian Ridgeback	PRJEB16012	SAMEA104091554
RR123	Rhodesian Ridgeback	PRJEB16012	SAMEA4504822
RR224	Rhodesian Ridgeback	PRJEB16012	SAMEA4505495
SG005	Sloughi	PRJEB13468	SAMEA3928143
SG006	Sloughi	PRJEB16012	SAMEA4506885
SG008	Sloughi	PRJEB16012	SAMEA4506888
SH008	Greater Swiss Mountain Dog	PRJEB16012	SAMEA4504837
SL006	Saluki	PRJEB16012	SAMEA4504825
SS004	Shetland Sheepdog	PRJEB16012	SAMEA104091573
SY001	Alaskan Husky (not purebred)	PRJEB9590	SAMEA3449656
SY018	Alaskan Husky (not purebred)	PRJEB9591	SAMEA3449657
SY046	Siberian Husky	PRJEB16012	SAMEA104091559
TA001	Airedale Terrier	PRJEB16012	SAMEA4506896
TM1	Tibetan Mastiff	PRJNA266585	Bai, B., W.-M. Zhao, B.-X. Tang, Y.-Q. Wang, L. Wang et al., 2015 DoGSD: The Dog and Wolf Genome SNP Database. Nucleic Acids Res. 43 (Database issue): D777-783.
TM10	Tibetan Mastiff	PRJNA266585	Bai, B., W.-M. Zhao, B.-X. Tang, Y.-Q. Wang, L. Wang et al., 2015 DoGSD: The Dog and Wolf Genome SNP Database. Nucleic Acids Res. 43 (Database issue): D777-783.
TM2	Tibetan Mastiff	PRJNA266585	Bai, B., W.-M. Zhao, B.-X. Tang, Y.-Q. Wang, L. Wang et al., 2015 DoGSD: The Dog and Wolf Genome SNP Database. Nucleic Acids Res. 43 (Database issue): D777-783.
TM3	Tibetan Mastiff	PRJNA266585	Bai, B., W.-M. Zhao, B.-X. Tang, Y.-Q. Wang, L. Wang et al., 2015 DoGSD: The Dog and Wolf Genome SNP Database. Nucleic Acids Res. 43 (Database issue): D777-783.
TM4	Tibetan Mastiff	PRJNA266585	Bai, B., W.-M. Zhao, B.-X. Tang, Y.-Q. Wang, L. Wang et al., 2015 DoGSD: The Dog and Wolf Genome SNP Database. Nucleic Acids Res. 43 (Database issue): D777-783.
TM5	Tibetan Mastiff	PRJNA266585	Bai, B., W.-M. Zhao, B.-X. Tang, Y.-Q. Wang, L. Wang et al., 2015 DoGSD: The Dog and Wolf Genome SNP Database. Nucleic Acids Res. 43 (Database issue): D777-783.
TM6	Tibetan Mastiff	PRJNA266585	Bai, B., W.-M. Zhao, B.-X. Tang, Y.-Q. Wang, L. Wang et al., 2015 DoGSD: The Dog and Wolf Genome SNP Database. Nucleic Acids Res. 43 (Database issue): D777-783.
TM7	Tibetan Mastiff	PRJNA266585	Bai, B., W.-M. Zhao, B.-X. Tang, Y.-Q. Wang, L. Wang et al., 2015 DoGSD: The Dog and Wolf Genome SNP Database. Nucleic Acids Res. 43 (Database issue): D777-783.
TM8	Tibetan Mastiff	PRJNA266585	Bai, B., W.-M. Zhao, B.-X. Tang, Y.-Q. Wang, L. Wang et al., 2015 DoGSD: The Dog and Wolf Genome SNP Database. Nucleic Acids Res. 43 (Database issue): D777-783.
TM9	Tibetan Mastiff	PRJNA266585	Bai, B., W.-M. Zhao, B.-X. Tang, Y.-Q. Wang, L. Wang et al., 2015 DoGSD: The Dog and Wolf Genome SNP Database. Nucleic Acids Res. 43 (Database issue): D777-783.
WE006	Weimaraner	PRJEB16012	SAMEA4506902
WH083	Whippet	PRJEB13468	SAMEA4506886
WO001_895	Wolf	PRJEB16012	SAMEA104091563
WO002_732	Wolf	PRJEB16012	SAMEA104091564
WO003_636	Wolf	PRJEB16012	SAMEA104091565
WW174	West Highland White Terrier	PRJEB16012	SAMEA4506901
WW361	West Highland White Terrier	PRJEB16012	SAMEA4504842
WW362	West Highland White Terrier	PRJEB16012	SAMEA4509489
WW363	West Highland White Terrier	PRJEB16012	SAMEA4504843
WW364	West Highland White Terrier	PRJEB16012	SAMEA4504836
WW558	West Highland White Terrier	PRJEB16012	SAMEA104091561
WW64	West Highland White Terrier	PRJEB13723	SAMEA3940300
YJ1	Chinese indigenous dogs	PRJNA266585	Bai, B., W.-M. Zhao, B.-X. Tang, Y.-Q. Wang, L. Wang et al., 2015 DoGSD: The Dog and Wolf Genome SNP Database. Nucleic Acids Res. 43 (Database issue): D777-783.
YJ2	Chinese indigenous dogs	PRJNA266585	Bai, B., W.-M. Zhao, B.-X. Tang, Y.-Q. Wang, L. Wang et al., 2015 DoGSD: The Dog and Wolf Genome SNP Database. Nucleic Acids Res. 43 (Database issue): D777-783.
YJ3	Chinese indigenous dogs	PRJNA266585	Bai, B., W.-M. Zhao, B.-X. Tang, Y.-Q. Wang, L. Wang et al., 2015 DoGSD: The Dog and Wolf Genome SNP Database. Nucleic Acids Res. 43 (Database issue): D777-783.
YJ4	Chinese indigenous dogs	PRJNA266585	Bai, B., W.-M. Zhao, B.-X. Tang, Y.-Q. Wang, L. Wang et al., 2015 DoGSD: The Dog and Wolf Genome SNP Database. Nucleic Acids Res. 43 (Database issue): D777-783.
YJ5	Chinese indigenous dogs	PRJNA266585	Bai, B., W.-M. Zhao, B.-X. Tang, Y.-Q. Wang, L. Wang et al., 2015 DoGSD: The Dog and Wolf Genome SNP Database. Nucleic Acids Res. 43 (Database issue): D777-783.
YJ6	Chinese indigenous dogs	PRJNA266585	Bai, B., W.-M. Zhao, B.-X. Tang, Y.-Q. Wang, L. Wang et al., 2015 DoGSD: The Dog and Wolf Genome SNP Database. Nucleic Acids Res. 43 (Database issue): D777-783.
YJ7	Chinese indigenous dogs	PRJNA266585	Bai, B., W.-M. Zhao, B.-X. Tang, Y.-Q. Wang, L. Wang et al., 2015 DoGSD: The Dog and Wolf Genome SNP Database. Nucleic Acids Res. 43 (Database issue): D777-783.
YJ9	Chinese indigenous dogs	PRJNA266585	Bai, B., W.-M. Zhao, B.-X. Tang, Y.-Q. Wang, L. Wang et al., 2015 DoGSD: The Dog and Wolf Genome SNP Database. Nucleic Acids Res. 43 (Database issue): D777-783.
YT003	Yorkshire Terrier	PRJEB13468	SAMEA3928145
ZS14	Landseer	PRJEB7734	SAMEA3121328
ZS14_2	Pomeranian	PRJEB16012	SAMEA4506892
ZZ16_MS06	Zwergschnauzer	PRJEB16012	SAMEA3444493
ZZ17_MS07	Zwergschnauzer	PRJEB16012	SAMEA1066474
ZZ18_MS08	Zwergschnauzer	PRJEB16012	SAMEA1066475
ZZ19_MS09	Zwergschnauzer	PRJEB16012	SAMEA1066476

## Sheet: Sheet2
AC023
AC065
AC108
AD009
AM007
AR001
AS006
BB011
BC0480
BC272
BC273
BC485
BC518
BC555
BC597
BD016
BD036
BD052
BD085
BD089
BD091
BD093
BD098
BE020
BG064
BH003
BT007
BT012
BU002
CE073
CH019
CK006
CK023
CP003
CR039
CW011
DD116
DH0117
DH098
DH126
DO159
DO242
DO263
DQ1
DQ10
DQ2
DQ3
DQ4
DQ5
DQ6
DQ7
DQ8
DQ9
DS032
DS041
DS042
DS043
DS051
DS053
EL565
EN091
EN154
EN221
EN247
EN261
EN262
EN263
EN264
EU008
EU035
FB046
FB065
GR0855
GR0859
GR0860
GR0892
GR1078
GS1
GS10
GS104
GS2
GS3
GS4
GS5
GS6
GS7
GS8
GS9
GW004
GY432
HT001
HW1706
IT221
JR0034
JT007
KF042
KKH2684
KM1
KM10
KM2
KM3
KM4
KM5
KM6
KM7
KM8
KM9
LA1869
LA2382
LA2443
LA882
LA900
LB111
LB1919
LJ1
LJ10
LJ2
LJ3
LJ4
LJ5
LJ6
LJ7
LJ8
LJ9
LN048
LN47
LR1030
LR390
LR433
LR494
LR753
MA008
MA0163
MA094
MA142
MA152
MA324
MI016
NW062
NW152
NW206
NW255
OS001
PE002
PL116
RO2
RR098
RR123
RR224
SG005
SG006
SG008
SH008
SL006
SS004
SY001
SY018
SY046
TA001
TM1
TM10
TM2
TM3
TM4
TM5
TM6
TM7
TM8
TM9
WE006
WH083
WO001_895
WO002_732
WO003_636
WW174
WW361
WW362
WW363
WW364
WW558
WW64
YJ1
YJ2
YJ3
YJ4
YJ5
YJ6
YJ7
YJ9
YT003
ZS14
ZS14_2

## Sheet: Sheet3
31	8524937	8524938		8524938
31	8532012	8532013		8532013
31	8536244	8536245		8536245
31	8536361	8536362		8536362
31	8552861	8552862		8552862
31	8574903	8574904		8574904
31	9442346	9442347		9442347
31	9936027	9936028		9936028
